# Supplementary material
Source: PubMed Central journal article supplement (PMC4442711)
Supplement: NIHMS670083-supplement.pdf [file NIHMS670083-supplement.pdf]

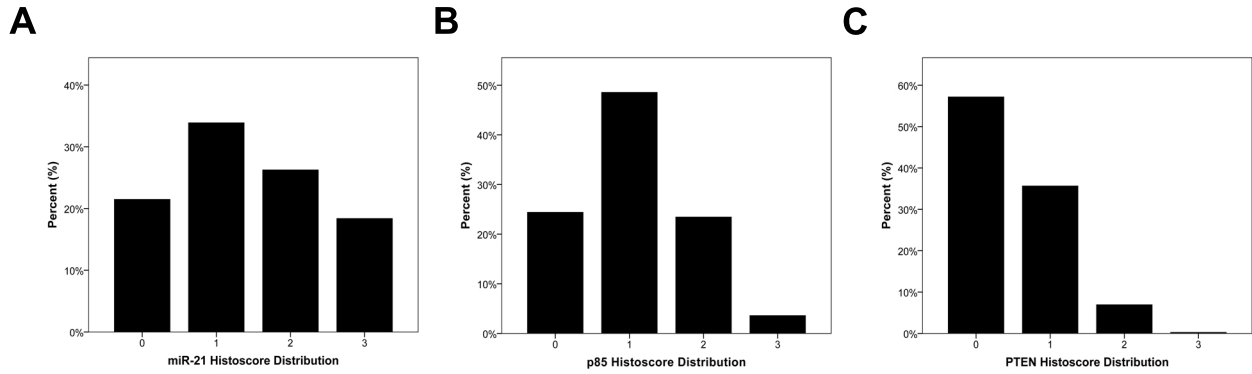

**Fig. S1 Distribution of histoscores for miR-21 ISH as well as p85 $\alpha$  and PTEN IHC.** Mean histoscores were miR-21: 1.4 (SD 1.0); p85 $\alpha$ : 1.1 (SD 0.8); PTEN 0.5 (SD 0.6).

Tumor 1

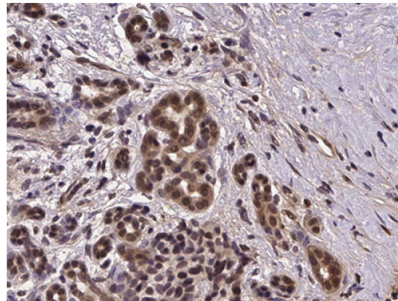

Tumor 2

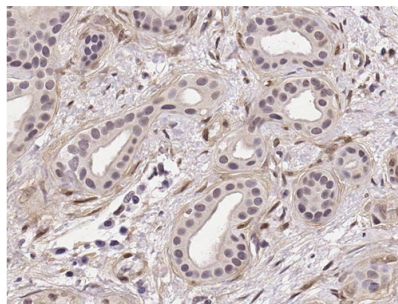

**Fig. S2 Representative PTEN IHC.**

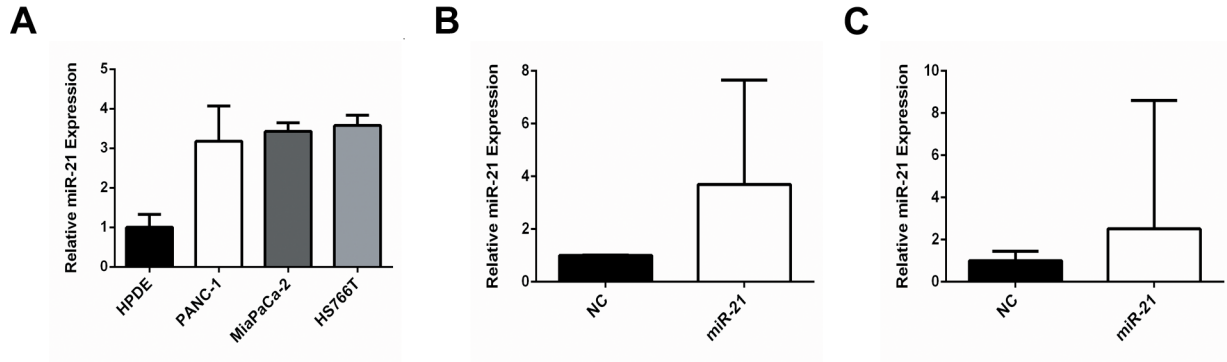

**Fig. S3 Expression level of miR-21 in TCs.** Baseline expression of miR-21, relative to normal ductal epithelial cells (HPDE), in PDAC TCs (A). Expression levels of miR-21 in MiaPaCa-2 (B) and Hs766T (C) after treatment with negative control (NC) or miR-21 mimic (miR-21).

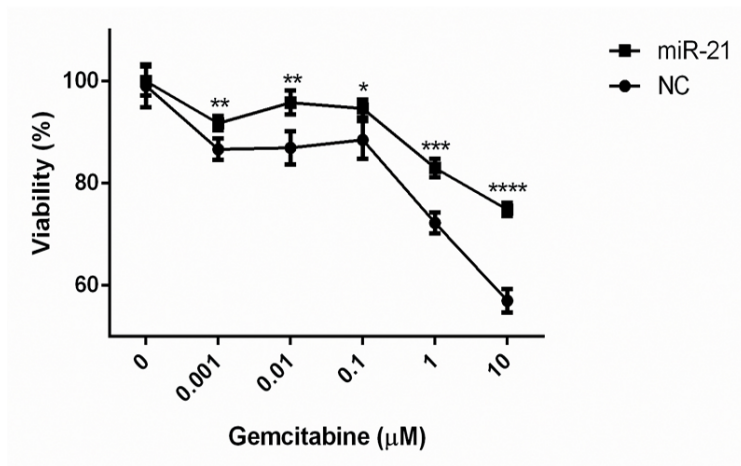

**Fig. S4 Overexpression of miR-21 causes gemcitabine resistance in PDAC TCs.** PANC-1 cells were treated with negative control (NC) or miR-21 mimic (miR-21) then exposed to gemcitabine for 72h at the indicated concentrations. MTT assays were performed to quantify cell viability. \* $p < 0.05$ , \*\* $p < 0.01$ , \*\*\* $p < 0.001$ , \*\*\*\* $p < 0.0001$ .

**Table S1 Clinical data corresponding to tumors used for ISH and IHC**

| <b>Patient</b> | <b>Age</b> | <b>Gender</b> | <b>Differentiation</b> | <b>Stage<sup>a</sup></b> | <b>Tumor Size (cm)</b> | <b>LN</b> | <b>LVI</b> | <b>PNI</b> | <b>Margin</b> |
|----------------|------------|---------------|------------------------|--------------------------|------------------------|-----------|------------|------------|---------------|
| 1              | 79         | F             | Moderate               | IIB                      | 3.2                    | +         | -          | -          | -             |
| 2              | 70         | M             | Poor                   | IIB                      | 3.9                    | +         | +          | +          | +             |
| 3              | 74         | F             | Moderate               | IIB                      | 3.1                    | +         | +          | +          | -             |
| 4              | 69         | F             | Poor                   | IIB                      | 4.1                    | +         | +          | +          | -             |
| 5              | 59         | M             | Well                   | IIB                      | 6.1                    | +         | -          | +          | +             |
| 6              | 56         | M             | Moderate               | IIB                      | 2.0                    | +         | +          | +          | -             |
| 7              | 64         | F             | Moderate               | IIB                      | 3.6                    | +         | +          | +          | -             |
| 8              | 67         | F             | Moderate               | IIB                      | 3.5                    | +         | +          | +          | +             |
| 9              | 75         | M             | Poor                   | IIA                      | 1.8                    | -         | -          | +          | -             |
| 10             | 48         | M             | Well                   | IIB                      | 3.0                    | +         | -          | +          | +             |
| 11             | 68         | F             | Moderate               | IIA                      | 2.5                    | -         | -          | +          | -             |
| 12             | 75         | M             | Moderate               | IIA                      | 3.0                    | -         | -          | +          | +             |
| 13             | 84         | F             | Well                   | IIB                      | 3.4                    | +         | +          | +          | +             |
| 14             | 59         | M             | Moderate               | IIB                      | 3.7                    | +         | +          | +          | +             |

<sup>a</sup>AJCC VII Stage

LN, lymph node; LVI, lymphovascular invasion; PNI, perineural invasion
